# Supplementary material
Source: publisher figshare collection journal article supplement (https://rs.figshare.com/ndownloader/files/13757105)
Supplement: Supplementary file 1 [file 13757105]

## Sheet: Figure labelling
Table S3. Genes up-regulated in systemic leaves
Genes in different regions of the Venn diagram are shown in specific Excel sheets labeled with the corresponding letters
FC = fold change

## Sheet: a
Gene ID	Discription	log2 (FC) afte 2 WW
GRMZM2G126566	myb51 protein	4.2341
GRMZM5G873581	NA	3.7583
GRMZM2G472821	eukaryotic peptide chain release factor subunit 1-3-like	2.2297
GRMZM2G124053	ww domain containing protein	1.33106
GRMZM2G071771	pvr3-like protein	1.20962
GRMZM2G056079	transmembrane protein pft27	1.10685
GRMZM2G082385	abc transporter b family member 4-like	1.10268
GRMZM2G000221	pvr3-like protein	1.06219

## Sheet: b
Gene ID	Discription	log2 (FC) afte 2 WW	log2 (FC) afte 2 WO
AC191009.3	protein	NA	inf
GRMZM2G177076	protein	1.31567	1.41111
GRMZM2G122618	uncharacterized membrane protein at1g06890-like	1.19188	1.30931

## Sheet: c
Gene ID	Discription	log2 (FC) afte 2 WW	log2 (FC) afte 2 WO	log2 (FC) afte 6 WO
GRMZM2G018627	chlorophyll a-b binding protein	2.07098	1.11872	2.01123

## Sheet: d
Gene ID	Discription	log2 (FC) afte 2 WW	log2 (FC) afte 6 WO
GRMZM2G700063	NA	inf	inf
GRMZM2G114332	sec1 family transport protein sly1-like	1.50963	1.33058
GRMZM2G044317	dna primase large subunit	1.37235	1.91305
GRMZM2G037077	uncharacterized protein LOC100274677	1.06822	1.07989

## Sheet: e
Gene ID	Discription	log2 (FC) afte 2 WW	log2 (FC) afte 6 WW	6 WO
AC208915.3	protein	1.52732	2.5553	1.37468
GRMZM2G111954	aldo-keto reductase oxidoreductase	1.71941	2.23841	1.80991
GRMZM2G104549	protein	1.2387	2.19821	1.08583
GRMZM2G098739	inf	inf	inf	inf

## Sheet: f
Gene ID	Discription	log2 (FC) afte 2 WW	log2 (FC) afte 2 WO	log2 (FC) afte 6 WW	log2 (FC) afte 6 WO
GRMZM2G312061	cysteine proteinase inhibitor	3.19013	3.7979	5.09233	4.31512
GRMZM2G156861	lipoxygenase	2.31253	2.87869	2.57727	2.21372
GRMZM2G079616	10-deacetylbaccatin iii 10-o-acetyltransferase	1.37735	2.80312	3.79009	3.52764
GRMZM2G108514	tyrosine decarboxylase	1.57812	2.76106	4.24673	3.78992
GRMZM2G011523	bowman-birk type wound-induced proteinase inhibitor wip1 precursor	2.19761	2.7559	2.91596	2.01228
GRMZM2G099678	bark storage protein a-like	1.61704	2.69898	3.46639	3.47248
GRMZM2G121753	sant myb protein	1.62606	2.58259	2.00362	1.12182
GRMZM2G002178	allene oxide synthase	1.57817	2.56773	3.05824	2.54242
GRMZM2G020254	wrky transcription factor 44	1.40434	2.31497	1.42847	1.77054
GRMZM2G176998	wd40-like beta propeller repeat family expressed	2.41445	2.0635	2.09982	2.36868
GRMZM2G042789	mpi	1.88262	2.00102	3.5074	3.13983
GRMZM2G177104	gibberellin 2-beta-dioxygenase 8-like	1.85184	1.81867	1.03871	1.21188
GRMZM2G103197	chlorophyllase- chloroplast	1.00376	1.67389	2.10303	1.3486
GRMZM2G470882	unknown	1.58005	1.59088	2.27707	1.9072
GRMZM2G104176	iaa16 - auxin-responsive aux iaa family member	1.13366	1.08296	2.22763	1.5917

## Sheet: g
Gene ID	Discription	log2 (FC) afte 2 WW	log2 (FC) afte 2 WO	log2 (FC) afte 6 WW
GRMZM2G168898	hemoglobin 2	1.10899	1.55226	1.60511
GRMZM2G121573	leucine-rich repeat transmembrane protein kinase 2	1.22461	1.5093	1.53468
GRMZM2G373522	dehydrin cor410	1.06038	1.29681	1.12806

## Sheet: h
Gene ID	Discription	log2 (FC) afte 2 WW	log2 (FC) afte 6 WW
AC233882.1	abc transporter b family member 11-like	1.30193	1.04984

## Sheet: I
Gene ID	Discription	log2 (FC) afte 6 WW	log2 (FC) afte 6 WO
GRMZM2G396090	NA	inf	inf
AC214791.2	protein twin sister of ft-like	inf	inf
GRMZM2G156632	wound-induced serine protease inhibitor	4.40601	3.17924
GRMZM2G116902	peroxidase n-like	2.70774	1.6855
GRMZM2G065585	beta glucanase	2.56682	1.6941
GRMZM2G117246	leucoanthocyanidin dioxygenase	2.39454	1.9741
log2 (FC) afte GRMZM2G028393	maize proteinase inhibitor	2.18452	2.13414
GRMZM2G161905	glutathione s-transferase	2.14799	2.16843
GRMZM2G134264	pore-forming toxin-like protein hfr-2	2.10305	1.94266
GRMZM2G136453	nucleotide pyrophosphatase phosphodiesterase	2.10015	1.56412
GRMZM2G071704	hypothetical protein SORBIDRAFT_06g018650	1.94564	1.84941
GRMZM6G617209	NA	1.84937	1.4177
GRMZM2G414192	chlorophyll a-b binding protein	1.83018	1.28957
GRMZM2G451308	ring-h2 finger protein atl78-like	1.71156	1.51822
GRMZM2G102079	elicitor-inducible cytochrome p450	1.70804	1.36496
GRMZM2G131202	thioredoxin m	1.66644	1.36055
GRMZM2G434541	glutathione s-transferase gstu6	1.66615	1.75729
GRMZM2G133400	structural constituent of ribosome	1.65385	1.35591
GRMZM2G108219	anionic peroxidase	1.62164	1.49416
GRMZM2G005849	glucosamine-fructose-6-phosphate aminotransferase	1.61401	1.55898
GRMZM2G107739	alanine--glyoxylate aminotransferase 2 homolog mitochondrial-like	1.6041	1.83235
AC199526.5	hypothetical protein SORBIDRAFT_01g038245	1.59867	1.21715
GRMZM2G055834	probable peptide nitrate transporter at3g53960-like	1.57598	1.18957
AC148152.3	ankyrin repeat-containing protein at3g12360-like	1.57296	1.26321
AC212219.3	flavonol synthase flavanone 3-hydroxylase-like	1.51372	1.55699
GRMZM2G083058	hypothetical protein SORBIDRAFT_02g022510	1.49809	1.605
GRMZM2G370745	cytochrome p450	1.48221	1.51577
GRMZM2G051219	anthranilate phosphoribosyltransferase	1.43792	1.39316
GRMZM2G015419	lipoxygenase	1.40411	1.35727
GRMZM2G125943	histidine kinase	1.36203	1.71644
GRMZM2G091643	4-coumarate-coa ligase	1.34864	1.11687
GRMZM2G056500	pore-forming toxin-like protein hfr-2	1.33434	1.37525
GRMZM2G040095	lipoxygenase	1.32513	1.26859
GRMZM2G116966	benzoate carboxyl methyltransferase	1.31594	1.45475
GRMZM2G127350	alanine--glyoxylate aminotransferase 2 homolog mitochondrial-like	1.31586	1.51204
GRMZM2G181000	monoglyceride lipase	1.296	1.20187
GRMZM2G123480	NA	1.25881	1.34346
GRMZM2G374302	arginine decarboxylase	1.25596	1.18611
GRMZM2G035790	probable peptide transporter at1g52190-like	1.20581	1.16586
GRMZM2G133718	serine carboxypeptidase precursor	1.18782	1.1156
GRMZM2G430675	white-brown-complex abc transporter family	1.18015	1.12688
GRMZM2G031660	beta-glucosidase precursor	1.16766	1.09552
GRMZM2G153536	branched-chain-amino-acid aminotransferase chloroplast expressed	1.11997	1.47825
GRMZM2G046952	gem-like protein 4-like	1.1149	1.12961
GRMZM2G349875	receptor-like kinase	1.0914	1.37315
GRMZM2G004036	isoflavone reductase homolog a622-like	1.04912	1.08638
GRMZM2G049418	sd1	1.04043	1.16429
GRMZM2G117608	mlo-like protein 1	1.02911	1.043
GRMZM2G061806	agmatine coumaroyltransferase-1-like	1.02615	1.13608
GRMZM2G312877	lactoylglutathione lyase	1.02093	1.42006
GRMZM2G136857	salicylate o-methyltransferase	1.0177	1.0398
GRMZM2G015542	cytochrome p450	1.01439	1.31851

[truncated: 7 more sheets: j, k, L, m, n, o, heatmap]
